1

2 **Clinically Relevant Pathogens on Surfaces Display Differences in Survival and**  
3 **Transcriptomic Response in Relation to Probiotic and Traditional Cleaning Strategies**

4 Jinglin Hu<sup>1</sup>, Weitao Shuai<sup>1</sup>, Jack T. Sumner<sup>1</sup>, Anahid A. Moghadam<sup>1</sup>, Erica M. Hartmann<sup>\*,1</sup>

5 <sup>1</sup>Department of Civil and Environmental Engineering, Northwestern University, Evanston, IL  
6 60208 USA

7

8 ***Abstract***

9

10 Prolonged survival of clinically relevant pathogens on inanimate surfaces represents a major  
11 concern in healthcare facilities. Contaminated surfaces can serve as reservoirs of potential  
12 pathogens and greatly hinder the prevention of healthcare-associated infections. Probiotic  
13 cleaning using environmental microorganisms to promote inter-species competition has been  
14 proposed as an alternative to traditional chemical-based cleaning using antimicrobials. Probiotic  
15 cleaning seeks to take advantage of ecological principles such as competitive exclusion and  
16 utilize benign microorganisms to inhibit viable pathogens on indoor surfaces. However, limited  
17 mechanistic study has yielded direct evidence that enables the scientific community to  
18 understand the stress response, or microbe-microbe interactions between healthcare-associated  
19 pathogens and probiotic bacteria. Therefore, to bridge this knowledge gap, we combined  
20 transcriptomics and traditional microbiology techniques to investigate the differential impact of  
21 chemical-based and probiotic surface cleaners on the survival of *Acinetobacter baumannii* and  
22 *Klebsiella pneumoniae*, two clinically important pathogens. Although probiotic *Bacillus* included

23 in a commercialized All-Purpose Probiotic Cleaner persisted on surfaces for an extended period  
24 of time, surfaces contaminated with *A. baumannii* cleaned using chemical-based detergent with  
25 and without probiotic *Bacillus* showed no statistical difference in the viable colony forming units  
26 (CFUs) of *A. baumannii*. Similarly, for *Klebsiella pneumoniae*, there were negligible statistical  
27 differences in CFUs between probiotic and detergent cleaning scenarios. The transcriptome of *A.*  
28 *baumannii* with and without probiotic addition shared a high degree of similarity in overall gene  
29 expression, while the transcriptome of *K. pneumoniae* with and without probiotic addition  
30 differed in overall gene expression. Together, these results highlight the need to fully understand  
31 the underlying biological and ecological mechanisms for different pathogens and practical  
32 implications of probiotic indoor cleaning.

33

34 **Keywords:** probiotic cleaner; *Acinetobacter baumannii*; *Klebsiella pneumoniae*; transcriptomic  
35 response; indoor surface cleaning; infection prevention

36 **1. Introduction**

37

38 *Acinetobacter baumannii* and *Klebsiella pneumoniae* have been recognized as a major source of  
39 healthcare-associated infections associated with high morbidity and mortality rates due to their  
40 resistance to many antibiotics including carbapenems<sup>1 2</sup>. *Acinetobacter* and *Klebsiella* species are  
41 capable of contaminating and persisting on inanimate surfaces for up to several months<sup>3</sup>,  
42 significantly increasing the risk of acquisition for hospitalized patients who are  
43 immunocompromised. Given the concern with transmission of infectious microorganisms  
44 including *Acinetobacter* and *Klebsiella*, many cleaning products contain added antimicrobials as  
45 disinfectants. However, questions remain about the extent to which chemicals, particularly  
46 antimicrobial products, reduce nosocomial infections and whether misuse of these products leads  
47 to antimicrobial resistance<sup>4-6</sup>. Several recent studies have demonstrated that cleaning using  
48 antimicrobials can effectively reduce microbial load on contaminated surfaces in health care  
49 facilities<sup>7</sup>. However, their effects on preventing disease transmission and reducing healthcare-  
50 acquired infections remain limited<sup>8</sup>. In addition to concerns about antimicrobial resistance,  
51 exposure to cleaning and disinfection agents can cause both acute and chronic health impacts.  
52 Healthcare workers with pre-existing respiratory illness, such as asthma, are particularly  
53 vulnerable<sup>9</sup>. As a result, an alternative strategy using microbiome manipulation draws increasing  
54 attention, seeking to promote inter-species competition between pathogens and probiotic  
55 microorganisms, namely *Bacillus*<sup>10-14</sup>, rather than using chemicals to combat pathogens in the  
56 built environment.

57

58 Falagas and Makris first proposed to use environmental probiotic microorganisms and/or  
59 biosurfactants to suppress the colonization of nosocomial pathogens and subsequently reduce  
60 nosocomial infections in healthcare facilities in 2009<sup>13</sup>. Since then, much work on the probiotic  
61 cleaning potential of *Bacillus* has been performed<sup>10-12,14</sup>. *Bacillus* is a genus of bacteria  
62 commonly found indoors<sup>15</sup>. Species of *Bacillus* are generally recognized as safe<sup>16</sup>, with a few  
63 exceptions (e.g., *Bacillus anthracis*). In addition to its prevailing presence, *Bacillus* bacteria are  
64 capable of forming spores<sup>17</sup>, which can remain viable for an extended period of time, making  
65 them ideal for storing in detergents.

66  
67 Probiotic cleaning seeks to take advantage of competitive exclusion and other ecological  
68 principles to inhibit viable pathogens on surfaces<sup>4,18</sup>, but there is limited direct evidence  
69 documenting these phenomena, along with stress response, or microbe-microbe interactions  
70 between probiotic and healthcare-associated pathogens. One major challenge is the technical  
71 limitations of many techniques, e.g., transcriptomic sequencing of low biomass samples  
72 collected from the built environment often suffers from a low signal-to-noise ratio. Therefore, to  
73 obtain a fundamental mechanistic understanding of indoor cleaning strategies and their impacts  
74 on microbial survival and interactions, we utilized microcosm chambers to simulate a simplified  
75 built environment with greater than usual microbial load. We seek to quantify the effects of  
76 probiotic cleaning on viability reduction of healthcare-associated pathogens (e.g., *A. baumannii*  
77 and *K. pneumoniae*) and evaluate inter-species interactions between *Bacillus* contained in a  
78 probiotic surface cleaner and healthcare-associated pathogens under ambient conditions and  
79 elevated temperature and humidity. Cleaning and probiotic products represent a multi-billion-  
80 dollar market and a critical tool in our arsenal against microbial infections. Being able to fully

81 understand microbe-chemical and microbe-microbe interactions will not only help determine the  
82 most successful contexts for probiotic cleaning, but also lead to better future product  
83 formulation.

84

## 85 **2. Materials and Method**

### 86 *2.1. Microcosm set-up*

87 A commercially available All-Purpose Probiotic Cleaner (APPC) was obtained from Graz,  
88 Austria. Clinical isolates of *Acinetobacter baumannii* (ABBL18) and *Klebsiella pneumoniae*  
89 (CRE231) were provided by Dr. Alan Hauser, Northwestern University Feinberg School of  
90 Medicine. To simulate a typical indoor surface environment, 24G stainless steel sheets were cut  
91 into 2"x2" squares. *A. baumannii* (ABBL18) and *K. pneumoniae* (CRE231) isolates were grown  
92 in 40 mL tryptic soy broth (TSB) for 23 hours at 30°C with continuous shaking to its mid log  
93 phase. The APPC was filtered through a 0.22  $\mu$ m syringe filter to create an All-Purpose Cleaner  
94 (APC) without probiotic materials as a control. Vegetative *Bacillus spp.* (VB) culture was  
95 prepared by mixing 0.1% APPC with TSB. This culture was incubated at 25°C for 23 hours with  
96 continuous shaking. Cells (*Bacillus spp.*, *A. baumannii* and *K. pneumoniae*) were harvested and  
97 washed in phosphate-buffered saline (PBS) before inoculation.

98

99 A total of six testing scenarios for each pathogen (twelve groups in total) are specified as  
100 follows:

101

102 Table 1 Testing scenarios for each pathogen (*A. baumannii* and *K. pneumoniae*) consisting of  
103 four cleaning conditions, and two temperature and humidity conditions.

104

| Cleaning Scenarios | Temperature and humidity conditions |                     |
|--------------------|-------------------------------------|---------------------|
|                    | 25°C and 20% RH                     | 37°C and 90% RH     |
| Pathogen           | Pathogen (A)                        | Pathogen (W)        |
| Pathogen + APC     | Pathogen + APC (A)                  | NA                  |
| Pathogen + APPC    | Pathogen + APPC (A)                 | Pathogen + APPC (W) |
| Pathogen + VB      | Pathogen + VB (A)                   | NA                  |

105

106 Each 2”x2” stainless steel surface was first inoculated with 50  $\mu$ L *A. baumannii* (corresponding  
107 to  $8.5 \times 10^7$  CFU) or 50  $\mu$ L *K. pneumoniae* (corresponding to  $1.0 \times 10^8$  CFU). 50  $\mu$ L sterilized PBS  
108 buffer, APC, APPC, or vegetative *Bacillus spp.* inoculum was added to create no-cleaning  
109 control samples (ABBL18 or CRE231), chemical cleaning samples (ABBL18 + APC or CRE231  
110 + APC), probiotic cleaning samples (ABBL18 + APPC or CRE231 + APPC), or vegetative  
111 cleaning samples (ABBL18 + VB or CRE231 + VB), respectively. Following the introduction of  
112 bacterial inoculum, all surfaces were transferred into autoclaved mason jars under two treatment  
113 conditions: 1) ambient temperature (25°C) and relative humidity (20%), and 2) elevated  
114 temperature (37°C) and relative humidity (>90%) with 10 mL of autoclaved milliQ water. All  
115 microcosm chambers were stored in incubators maintained at 25°C or 37°C. Swab samples were  
116 collected at three specific timepoints: 3 hours, 24 hours, and 72 hours following the inoculation  
117 and cleaning. Triplicate samples were prepared for each combination of cleaning, timepoint, and  
118 incubation conditions (Figure 1).

119

## 120 2.2. Swab sample collection

121 Swab samples were collected through a combination of dry and wet swabbing as performed  
122 previously<sup>19</sup>. Each surface was first dry swabbed from left to right for seven times and the swab  
123 was swirled into an aliquoted PBS buffer or RNAProtect Bacteria Reagent (Qiagen), for CFU  
124 enumeration and RNA extraction, respectively. Surfaces were then wet swabbed for a total of 20  
125 s, including 5 seconds of rinse and rewet. Finally, the swabs were left in 15 mL conical tubes and  
126 vortexed for 10 seconds. 100  $\mu$ L swab suspension along with its dilutions were spread onto  
127 tryptic soy agar (TSA) and CHROM *Acinetobacter baumannii* selective agar and on MacConkey  
128 agar as *Klebsiella pneumoniae* selective media<sup>20</sup> and incubated at 37°C. Numbers of colony  
129 forming units (CFUs) were counted after three days.

130

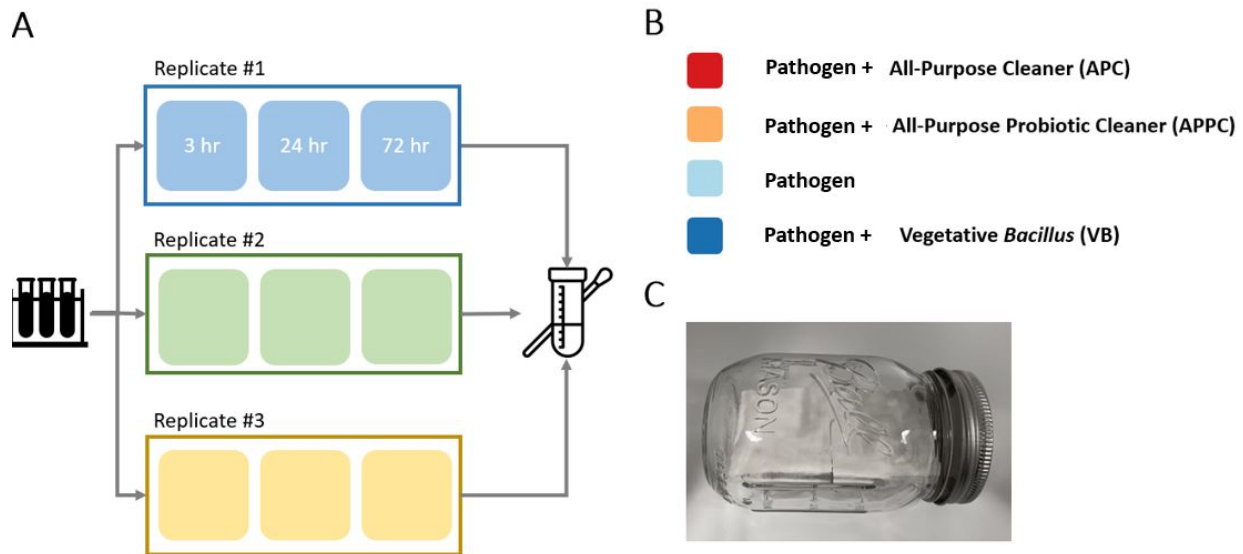

131

132 Figure 1. Microcosm experimental design (A) with four types of inoculums (B) containing  
133 pathogen (*A. baumannii* or *K. pneumoniae*) and *Bacillus spp.* and sealed sterile  
134 microcosm chamber maintained under ambient temperature and relative humidity (C).

135 The elevated temperature and humidity condition was maintained by adding 10 mL of  
136 sterilized milliQ water into the sealed chamber.

137

### 138 2.3. DNA extraction, sequencing, and construction of reference genomes

139 To obtain draft genomes for RNA read mapping, 5 mL *A. baumannii* or *K. pneumoniae* and 15  
140 mL *Bacillus spp.* DNA was extracted using the DNeasy PowerSoil Pro Kit (Qiagen) following  
141 the manufacturer's instructions. DNA samples were submitted to the Microbial Genome  
142 Sequencing Center (MiGS) for library construction and sequencing. KneadData v0.7.10  
143 (<https://bitbucket.org/biobakery/kneaddata/>) was then used for raw sequence quality control and  
144 contaminant removal with default parameters. Short reads were assembled into contigs using  
145 SPAdes v3.14.1<sup>21</sup> and each reference genome was annotated using Prokka v1.14.6<sup>22</sup>. Additional  
146 annotation of antibiotic and antimicrobial resistance genes were conducted using the  
147 Comprehensive Antibiotic Resistance Database (CARD)<sup>23</sup>. Assembled contigs from All Purpose  
148 Probiotic Cleaner were also binned into five metagenome-assembled genomes (MAGs) using  
149 metaWRAP<sup>24</sup>. CheckM<sup>25</sup> was used to assess the quality of microbial genomes. Taxonomic  
150 classification of each draft genome was determined by GTDB-Tk<sup>26</sup>.

151

### 152 2.4. RNA Extraction, Sequencing, and Data Processing

153 Swab samples were stored in RNAprotect Bacteria Reagent under -80°C until extraction. RNA  
154 was extracted using the RNeasy Mini Kit (Qiagen) following its recommended "Protocol 2:  
155 Enzymatic lysis and mechanical disruption of bacteria", consisting of a 10 min treatment with 15  
156 mg/mL lysozyme and 10 min beadbeating. Libraries were constructed at Northwestern NUSeg  
157 using the Illumina Total RNA Prep with Ribo-Zero Plus, according to manufacturers' protocol. A



158 total of 56 samples (54 samples collected at various time points and cleaning scenarios, one kit  
159 control, and one sample prepared for future between-batch normalization). Samples were  
160 sequenced using a HiSeq4000 with 50 bp single end reads.

161 Reference genomes constructed from whole genome sequencing were used for RNA mapping.  
162 Raw sequence files were processed using trim\_galore v0.6.6  
163 ([https://www.bioinformatics.babraham.ac.uk/projects/trim\\_galore/](https://www.bioinformatics.babraham.ac.uk/projects/trim_galore/)) and Kneaddata v0.7.10  
164 (<https://bitbucket.org/biobakery/kneaddata/>) to remove sequence adapters, low quality reads, and  
165 contaminants. Sortmerna v4.2.0<sup>27</sup> was used to filter rRNA reads against the silva-bac-16s-id90  
166 and silva-bac-23s-id98 databases. HISAT2 v2.1.0<sup>28</sup> was used to build local indices and map  
167 short reads onto reference draft genomes. Transcript abundances were quantified using  
168 featureCounts v2.0.1<sup>29</sup>. Differentially expressed genes (DEGs) were identified by DESeq2<sup>30</sup> at a  
169 significance level of 0.05 (Benjamini-Hochberg adjusted p-value). BlastKOALA (KEGG  
170 Orthology And Links Annotation) was used for K number assignment followed by Prokka  
171 annotation<sup>31</sup>. KEGG pathway enrichment analysis was further conducted using ClusterProfiler<sup>32</sup>.  
172 Statistical analysis, including Welch's paired two sample *t*-test, principal component analysis  
173 (PCA), and permutational multivariate analysis of variance (PERMANOVA, 9,999  
174 permutations) were conducted in R (version 4.1.2, 2021-11-01).

175

### 176 3. *Results and Discussion*

#### 177 *3.1. Survival of A. baumannii and K. pneumoniae under four cleaning scenarios and two* 178 *temperature/humidity conditions*

179 We quantified the colony forming units (CFUs) of *Acinetobacter baumannii* and *Klebsiella*  
180 *pneumoniae* (using CHROM selective agar for *Acinetobacter baumannii* and MacConkey agar

181 for *Klebsiella pneumoniae*) to examine their survival under ambient and wet conditions in  
182 combination with four cleaning strategies: 1) no cleaning (ABBL18 or CRE231), 2) chemical  
183 surface cleaning with All-Purpose Cleaning (ABBL18 + APC or CRE231 + APC), 3) probiotic  
184 surface cleaning with All-Purpose Probiotic Cleaner (ABBL18 + APPC or CRE231 + APPC), 4)  
185 and probiotic surface cleaning with vegetative *Bacillus spp.* (ABBL18 + VB or CRE231 + VB).  
186 Under the circumstances where *Bacillus* were introduced through APPC and VB cleaning, total  
187 CFUs were quantified using TSA.

188

189 Over the course of 3 days, we observed a maximum  $\log_{10}$  reduction of 8.75 for *A. baumannii*  
190 (ABBL18 + APC and ABBL18 + APPC under ambient condition) and 7.42 for *K. pneumoniae*  
191 (CRE231, CRE231 + APC and CRE231 + APPC). A minimum  $\log_{10}$  reduction of 3.75 for *A.*  
192 *baumannii* (ABBL18 under elevated temperature and humidity) and 2.26 for *K. pneumoniae*  
193 (CRE231 under elevated temperature and humidity). Under ambient conditions, both APC and  
194 APPC demonstrated a near-complete inactivation of *A. baumannii* within 72 hours (<LOD) and  
195 complete inactivation for *K. pneumoniae*. Although the survival of *A. baumannii* between APPC  
196 and APC are not statistically significant ( $p>0.05$ , Figure S1), APPC cleaning at 24 hours showed  
197 1.43 greater  $\log_{10}$  reduction compared to APC (Figure 2A). The reduction of *A. baumannii* was  
198 largely attributed to the chemical component; however, APPC might be able to achieve a near-  
199 complete removal of *A. baumannii* within a shorter time frame compared to the use of chemical-  
200 based APC alone. Differences in the survival of *K. pneumoniae* between APPC, APC and no-  
201 cleaning scenarios was not statistically significant ( $p>0.05$ , Figure S1), with only 0.77 greater  
202  $\log_{10}$  reduction in APPC compared to APC at 24 hours. The fact that *K. pneumoniae* was unable  
203 to persist on the surface without any cleaning product under ambient conditions indicated that

204 chemical components in the cleaning product only had marginal contribution to *K. pneumoniae*  
205 inactivation.  
206  
207 Surfaces cleaned with APPC were also gradually dominated by *Bacillus spp.* due to the  
208 decreasing absolute abundance of the pathogen population. This persistence of *Bacillus spp.* on  
209 surfaces was observed under both ambient and elevated humidity and temperature (Figure 2). In  
210 contrast to the spores included in APPC, *Bacillus spp.* introduced as vegetative cells (ABBL18 +  
211 VB) were gradually taken over by the *A. baumannii* population. In contrast, for CRE231 + VB  
212 the cleaned surface was still dominated by *Bacillus spp.* over *K. pneumoniae* (Figure 2A).  
213 Without the use of chemical-based surface cleaner (ABBL18 and ABBL18 + VB), *A. baumannii*  
214 showed comparable CFUs at all time points ( $p > 0.05$ ). Samples with and without APPC  
215 cleaning under elevated temperature and humidity showed significantly greater viable  
216 populations of *A. baumannii* ( $p < 0.01$ , Figure S1A), compared to ambient pairs. The same trend  
217 was observed for *K. pneumoniae* (Figure 2B), although paired *t*-tests showed low or no  
218 significance (Figure S1B). This result suggests greater potential health risks and infectious  
219 disease burdens in developing regions with a humid and hot climate and limited climate  
220 control<sup>33</sup>.

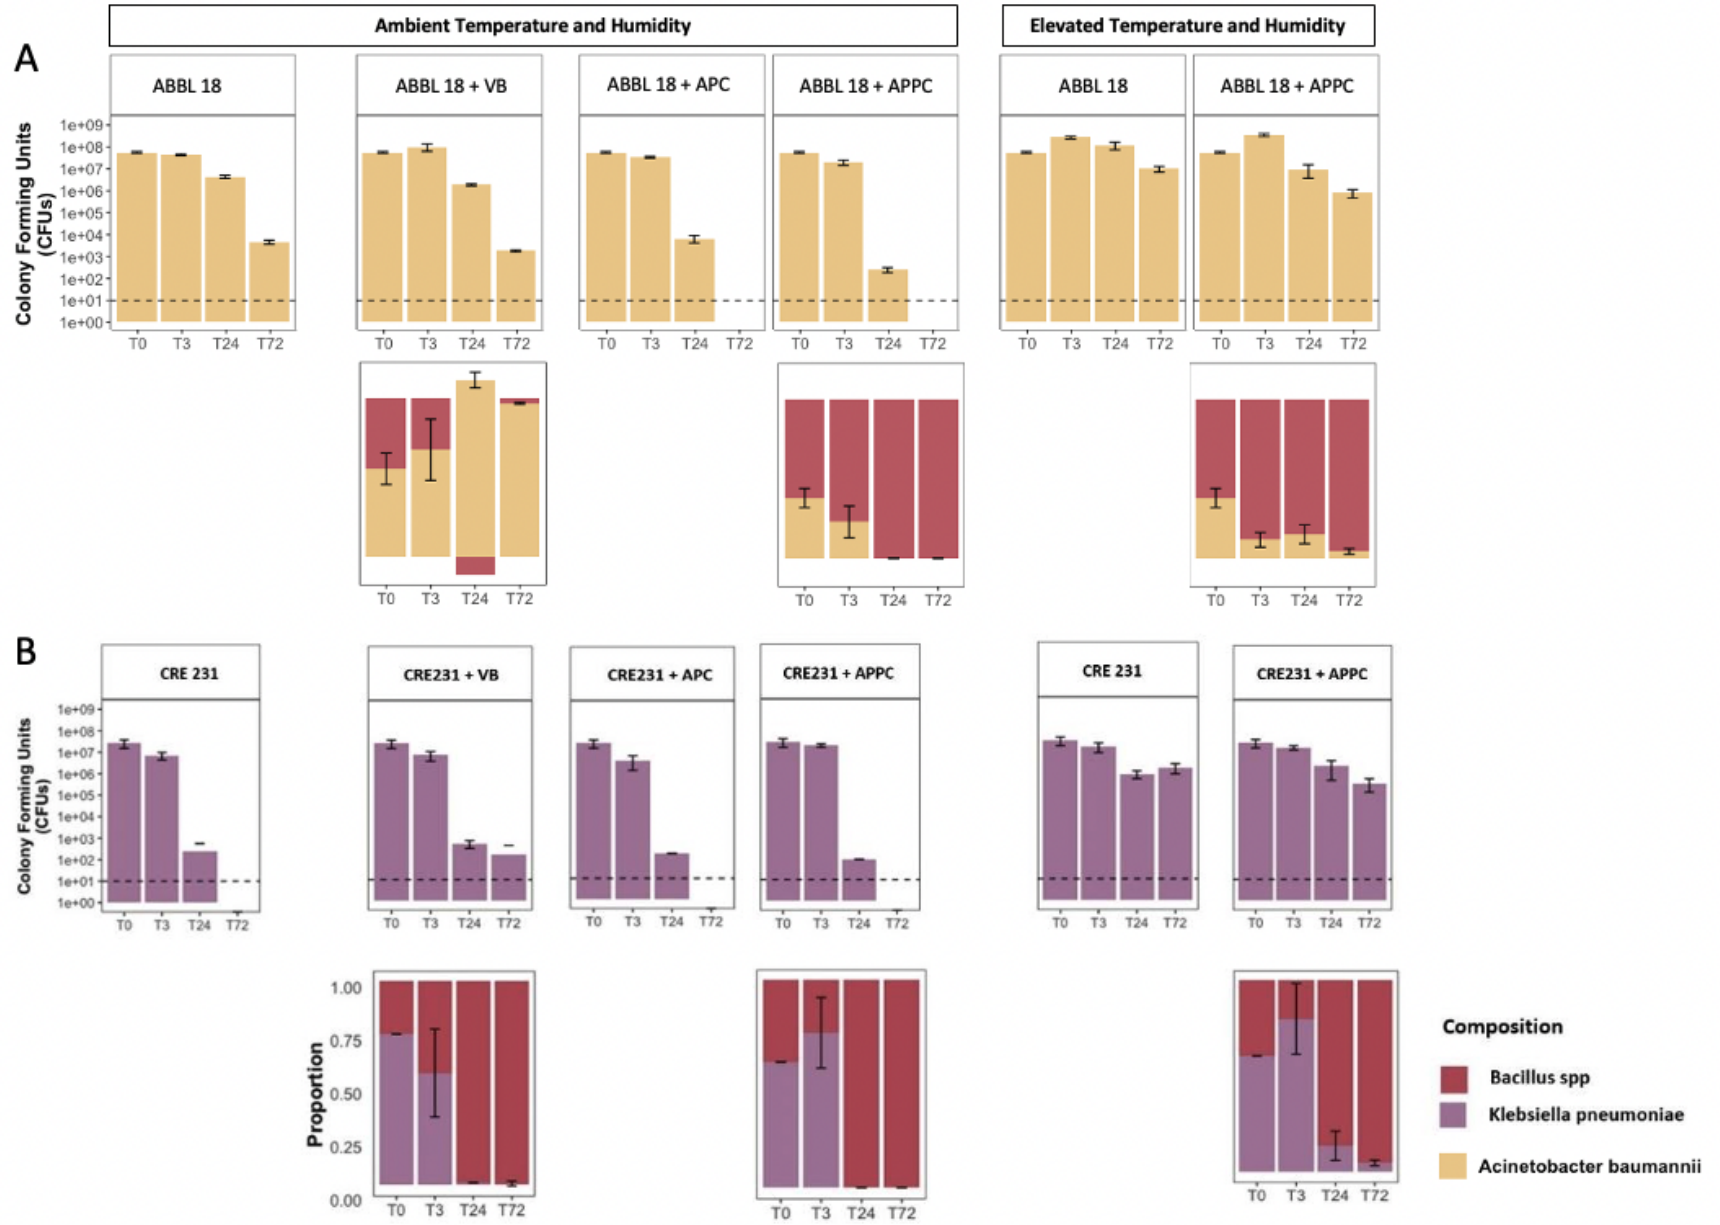

222 Figure 2. Colony forming units (CFU) of pathogens and composition of surface microbial community under four cleaning  
223 scenarios and two temperature and humidity conditions. CFUs of pathogens were counted on day 3 of incubation (37°C)  
224 on their selective media while total CFUs (pathogen and *Bacillus spp.*) were obtained from TSA. The proportions of *A.*  
225 *baumannii* and *K. pneumoniae* were calculated as the ratio between CFU from their selective media and CFU from TSA.  
226 The proportion of *Bacillus spp.* was calculated as  $1 - \frac{CFU(CHROM)}{CFU(TSA)}$ . Dashed lines represent a limit of detection (LOD) of 10  
227 CFU.

228 \* Due to possible technical variation, the proportion of *A. baumannii* exceeded 1 at T24 for ABBL18 + VB.

229 3.2. Overview of whole genome sequencing and metatranscriptomic data

230 Sequencing of the *A. baumannii* (ABBL18) isolate generated 3.72 million reads with an average  
231 read length of 136 bp. Reads were assembled into contigs with a N50 of 141,238 bp. Sequencing  
232 of *K. pneumoniae* (CRE231) generated 4.4 million reads with an average rate of 145 bp. Reads  
233 were assembled into contigs with a N50 of 113,698 bp. Sequencing of the All-Purpose Probiotic  
234 Cleaner resulted in 16.49 million reads with an average read length of 139 bp, after quality  
235 trimming and contaminant removal. Reads were assembled into contigs with a N50 of 143,313  
236 bp. Open reading frame (ORF) identification recognized 4,039, 5,823, and 22,429 coding regions  
237 for *A. baumannii*, *K. pneumoniae*, and APPC, respectively, 2,253, 4052, and 13,339 of which  
238 were functionally annotated (not as “hypothetical protein”) via Prokka. Among these annotated  
239 regions for *A. baumannii*, *K. pneumoniae*, and APPC assemblies, 2,150, 3,675, and 11,594 were  
240 classified into one or more KEGG Orthologs respectively. Contigs from APPC reads were  
241 binned into five groups with completeness > 90%, and contamination < 5%. All five bins were  
242 classified as *Bacillus* species as shown in Table 2.

243

244 Table 2. *Bacillus* genome binning and taxonomic assignment.

| <b>Bin</b> | <b>Completeness<br/>(%)</b> | <b>Contamination<br/>(%)</b> | <b>GC<br/>(%)</b> | <b>Size<br/>(Mbp)</b> | <b>Taxonomic Classification</b> |
|------------|-----------------------------|------------------------------|-------------------|-----------------------|---------------------------------|
| <b>1</b>   | 90.58                       | 1.883                        | 0.351             | 4.74                  | <i>Bacillus cereus</i>          |
| <b>2</b>   | 96.43                       | 1.489                        | 0.466             | 3.60                  | <i>Bacillus velezensis</i>      |
| <b>3</b>   | 99.11                       | 0.148                        | 0.436             | 4.11                  | <i>Bacillus subtilis</i>        |

|          |       |       |       |      |                               |
|----------|-------|-------|-------|------|-------------------------------|
| <b>4</b> | 98.21 | 0.087 | 0.461 | 4.28 | <i>Bacillus licheniformis</i> |
| <b>5</b> | 99.08 | 0.207 | 0.416 | 3.57 | <i>Bacillus safensis</i>      |

245

246 RNA samples containing *A. baumannii* or *K. pneumoniae* were collected for up to 72 hours of  
247 surface inoculation. Biological triplicates were collected for each condition and an average of  
248  $12.73 \pm 3.83$  and  $11.03 \pm 4.98$  million reads with an average read length of 49 bp were recovered  
249 for *A. baumannii* and *K. pneumoniae* experiments, respectively, after removing low-quality  
250 reads, contaminated sequences, adapters, and rRNA. The average mapping rate using HISAT2  
251 was  $98.20\% \pm 1.06\%$  for experiments with *A. baumannii* and  $96.40\% \pm 10.24\%$  for experiments  
252 with *K. pneumoniae* (Figure S2). Percentages of reads mapped onto *A. baumannii* and *Bacillus*  
253 genomes vary across four cleaning scenarios; VB samples containing vegetative *Bacillus spp.* on  
254 average had  $40.53\% \pm 6.07\%$  reads mapped onto *Bacillus* reference genomes, whereas this  
255 number for APPC samples was only  $0.56\% \pm 0.75\%$ . A similar trend was observed in  
256 experiments with *K. pneumoniae* and *Bacillus spp.* CRE231 + VB samples containing vegetative  
257 *Bacillus spp.* on average had  $40.52\% \pm 16.83\%$  reads mapped onto *Bacillus* reference genomes;  
258 however, this number was only  $1.00 \pm 1.08\%$  for APPC samples. Thus, these data suggest that the  
259 majority of *Bacillus* in the probiotic product were likely to remain as spores throughout the  
260 inoculation. Due to this insufficient coverage of *Bacillus* transcriptome in APPC samples, our  
261 transcriptomic analysis is composed of quantitative comparisons for the *A. baumannii* and *K.*  
262 *pneumoniae* transcriptomes and qualitative evaluations for *Bacillus spp.*

263

264 3.3. *Transcriptomes of A. baumannii and K. pneumoniae clustered into distinct groups*  
265 *determined by cleaning and physical conditions*

266  
267 Prior to conducting principal component analysis (PCA), read count data were transformed to  
268 remove the dependence of the variance on the mean. PCA of the transformed (variance  
269 stabilization) read counts belonging to *A. baumannii* indicated that the expression of *A.*  
270 *baumannii* clustered into three distinct groups based on cleaning scenarios and physical  
271 conditions (Figure 3A). Clustering of read counts from *K. pneumoniae* is more distinct for  
272 different time points and physical conditions (Figure S2) compared to cleaning scenarios and  
273 physical conditions (Figure 3C). PERMANOVA (9,999 permutations) revealed that temperature  
274 and humidity ( $p < 0.001$ ), cleaning ( $p < 0.001$ ), and time ( $p < 0.001$ ) explained 12%, 30%, and 9%  
275 of the variance for *A. baumannii* read counts, and 29%, 10%, and 12% for *K. pneumoniae* read  
276 counts, respectively. Gene expression profiles of *A. baumannii* with detergent cleaning (APPC  
277 and APC) are more similar to each other than they were to those without detergent (ABBL18 and  
278 VB). Temperature and humidity conditions also affected the expression of *A. baumannii* under  
279 the no-cleaning condition, but this impact was minimal when APPC was used. On the contrary,  
280 the temperature and humidity strongly affected the gene expression profiles of *K. pneumoniae*  
281 strongly, and the impact was more pronounced as the cleaning time extended from 3 hours to 24  
282 and 72 hours.

283  
284 Using no-cleaning samples (ABBL18 or CRE231) as the reference transcriptome, genes with  
285 absolute  $\log_2$  fold change values greater than or equal to 1 as calculated by DESeq2 were  
286 considered as differentially expressed (Benjamini-Hochberg adjusted p-value  $\leq 0.05$ ). 414, 522,



287 and 634 genes of *A. baumannii* and 578, 145, and 57 genes of *K. pneumoniae* were found to be  
288 differentially expressed in APC, APPC, and VB samples, respectively. The transcriptome of *A.*  
289 *baumannii* with APC and APPC shared the highest level of similarity and consequently, the  
290 smallest number of differentially expressed genes (APPC vs APC, Figure 3B). In the case of *K.*  
291 *pneumoniae*, VB samples were the most similar to no-cleaning samples. Consistent with  
292 previous PCA analysis, expression of *A. baumannii* under ambient and elevated temperature and  
293 humidity conditions are drastically different from each other (1298 DEGs, Figure 3B) whereas  
294 this difference in transcriptome diminished when APPC was used (133 DEGs). The high impact  
295 of elevated temperature and humidity persisted for *K. pneumoniae* even when APPC was applied  
296 (1828 and 1838 DEGs with or without APPC, Figure 3D). Since the transcriptome of *K.*  
297 *pneumoniae* under APPC cleaning was fairly similar to the no-cleaning scenario, their similar  
298 response to elevated temperature and humidity could be expected. Samples collected at various  
299 time points throughout the microcosm inoculation also showed that much of the temporal  
300 variation in gene expression occurred within 24 hours of surface cleaning and the number of  
301 differentially expressed genes of the 72-hour samples decreased from 211 to 21 for *A. baumannii*  
302 and from 876 to 19 for *K. pneumoniae* when compared to 3-hour and 24-hour samples. Similar  
303 trends of differentially expressed gene numbers over time were observed in the read counts from  
304 vegetative *Bacillus* (Figure S4), where no gene was considered to be differentially expressed  
305 within 24 hours based on the criteria described above.

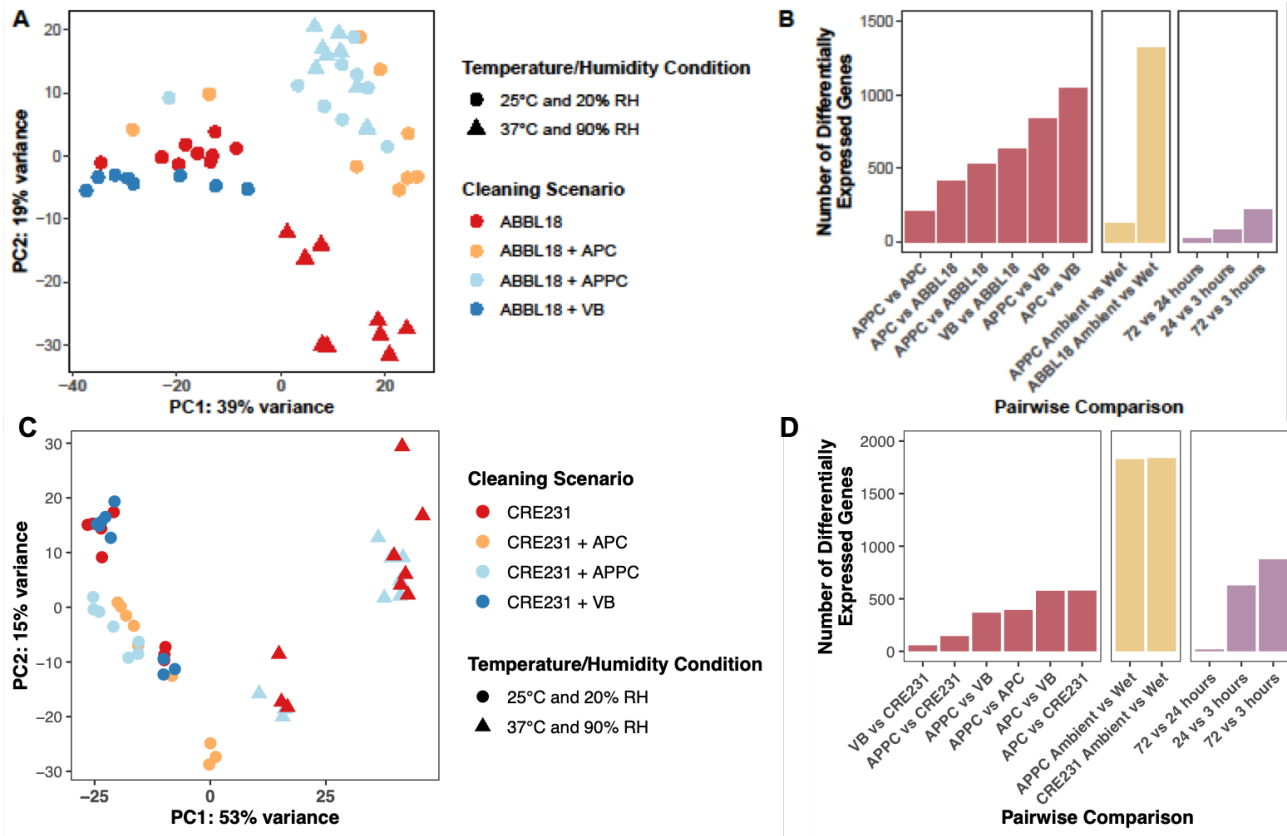

306

307 Figure 3. Principal component analysis on variance stabilized *Acinetobacter baumannii* (A) and *Klebsiella pneumoniae* (C)  
 308 read counts and number of differentially expressed genes of 11 pairwise comparisons for *Acinetobacter baumannii* (B)  
 309 and *Klebsiella pneumoniae* (D) experiments. Samples were color-coded based on cleaning conditions; each point (dot or  
 310 triangle) represents its corresponding temperature and humidity condition.

311 3.4. KEGG pathway enrichment profiles revealed different metabolic response under different  
312 cleaning scenarios  
313  
314 26 KEGG pathways related to metabolism (pyruvate, pyrimidine, purine, propionate, histidine,  
315 fatty acids, etc.), translation (ribosome and aminoacyl-tRNA biosynthesis), energy production  
316 (oxidative phosphorylation), and membrane transport (ABC transporters, and bacterial secretion  
317 system) were positively enriched with a statistical significance in samples containing vegetative  
318 *Bacillus* (ABBL18 + VB), compared to *A. baumannii* alone (ABBL18). Ribosome was the most  
319 significant pathway, with 42 up-regulated genes. When vegetative *Bacillus spp.* were present,  
320 protein synthesis of *A. baumannii* was likely promoted to achieve a large demand for surface  
321 competitions. On the other hand, three pathways (geraniol degradation, fatty acid metabolism,  
322 and valine, leucine, and isoleucine degradation) were positively enriched in samples with  
323 chemical-based detergent cleaning (ABBL18 + APC and ABBL18 + APPC), indicating that the  
324 *A. baumannii* population overall repressed metabolic activities and adaptively reduced synthesis  
325 in response to environment constraints associated with detergent cleaning (Figure 4A).  
326  
327 11 KEGG pathways related to metabolism (citrate cycle, pyruvate, tyrosine, histidine, starch,  
328 etc.), antibiotic resistance (cationic antimicrobial peptide resistance), and biofilm formation were  
329 positively enriched with a statistical significance in samples containing vegetative *Bacillus*  
330 (CRE231 + VB), compared to *K. pneumoniae* alone (CRE231). The TCA cycle was the most  
331 significant pathway with 26 up-regulated genes (p-adjusted < 0.001, NES 2.36). Genes involved  
332 in two-component systems and membrane transport (ABC) were upregulated in samples treated  
333 with probiotic or detergent cleaners but not in samples containing vegetative *Bacillus* (CRE231).

334 This suggests that chemical detergents, rather than *Bacillus*, induce environmental sensing and  
335 response mechanisms in *K. pneumoniae*.

336

337 Differential expression of metabolic genes by *K. pneumoniae* was observed in each treatment  
338 group relative to no-cleaning controls. Carbon metabolism genes were up-regulated in each  
339 treatment group; however, the exact carbon processing pathways differed between groups. TCA  
340 cycle, pyruvate, starch and sucrose metabolism genes were up-regulated in samples containing  
341 vegetative *Bacillus* (CRE231 + VB) or detergent cleaner (CRE231 + APC) but not in samples  
342 treated with probiotic cleaner (CRE231 + APPC), suggesting a non-specific stress response. In  
343 contrast, no pathways were mutually and specifically enriched in samples containing vegetative  
344 *Bacillus* (CRE231 + VB) or probiotic cleaner (CRE231 + APPC), which is likely influenced by  
345 the diminished transcriptional landscape of *Bacillus* in probiotic cleaner (Figure S2). This  
346 suggests that vegetative *Bacillus* and cleaning products induce alternative though overlapping  
347 carbon metabolism networks in *K. pneumoniae*. Indeed, increased expression of biosynthetic  
348 pathways (glyoxylate cycle, carbon fixation) suggests vegetative *Bacillus* may promote anabolic  
349 competency in *K. pneumoniae*. More research is needed to determine the role of metabolic  
350 manipulation with probiotics.

351

352 *3.5. Different cleaning scenarios induced differential expression of genes associated with stress*  
353 *response and competition*

354

355 Iron acquisition through siderophores is believed to be one of the key mechanisms of inter-  
356 species competitive exclusion<sup>34</sup>. Several genes responsible for siderophore synthesis, export, and

357 reception (e.g., aerobactin, anguibactin, and enterobactin) were slightly up-regulated in samples  
358 with detergent cleaning (Figure S5A) but down-regulated in samples containing vegetative  
359 *Bacillus spp.* in *A. baumannii* experiments. Although bacteria with multiple siderophore  
360 receptors can gain competitive advantages in social competition through siderophore cheating<sup>35</sup>,  
361 the down-regulation of siderophore-related genes in these samples was likely due to utilization of  
362 iron originating from lysed cell debris, especially from *Bacillus spp.*, rather than active  
363 competition through siderophore cheating, given the inability of vegetative *Bacillus spp.* to  
364 persist on surfaces (Figure 2A). For *K. pneumoniae* experiments, no siderophore-related gene  
365 was differentially expressed under the three cleaning scenarios (Figure S6A, *iutA*, *fepA*, and *fepC*  
366  $\log_2$  fold change absolute values < 1). The fact that *Bacillus* took over the surface in the presence  
367 of *K. pneumoniae* is likely related to *K. pneumoniae*'s inability to persist on the surface even  
368 without any cleaning (Figure 2B). Additionally, transformed *Bacillus spp.* read counts unveiled  
369 the predominant involvement of petrobactin as the primary siderophore in *Bacillus spp.* iron  
370 acquisition. Genes related to the synthesis, and export of *Acinetobacter*- and *Klebsiella*-  
371 associated siderophores (e.g., aerobactin, anguibactin, and enterobactin) were only occasionally  
372 expressed (Figure S7), further reducing the likelihood of having siderophore cheating on  
373 surfaces.

374

375 In addition to iron acquisition, genes related to Type VI Secretion Systems (T6SS), Type IV or  
376 Type I Pili, and biofilm formation were shown to have important implications in inter-species  
377 competition, virulence expression, and starvation response in *A. baumannii* or *K. pneumoniae*  
378 <sup>34,36,37</sup>. Genes associated with T6SS and Type IV Pili were slightly upregulated in APPC, APC,  
379 and VB samples for *A. baumannii* with varying statistical significance (Figure S5). Compared to

380 APC and APPC, a series of genes related to poly-beta-1,6-N-acetyl-D-glucosamine (PGA)  
381 production, a biofilm adhesin polysaccharide<sup>38,39</sup>, were up-regulated in the presence of vegetative  
382 *Bacillus spp.* The increased expression of the *pgaABCD* operon with roles in surface binding and  
383 maintaining biofilm structure stability<sup>38,39</sup> suggested greater potential for PGA production and  
384 subsequent biofilm activities in samples containing both *A. baumannii* and *Bacillus spp.* In  
385 contrast, genes related to T6SS and Type 1 Pili had negligible differences under different  
386 cleaning scenarios for *K. pneumoniae* (Figure S6B,D). Additionally, only a few biofilm  
387 formation related genes were differentially expressed under different cleaning scenarios  
388 compared to non-cleaning samples for *K. pneumoniae*. Using absolute log<sub>2</sub> fold change value  $\geq 1$   
389 as threshold, eight genes were differentially expressed (four up-regulated, four down-regulated)  
390 in chemical cleaner (APC) samples, two genes were differentially expressed (one up-regulated,  
391 one down-regulated) in probiotic cleaning (APPC) samples, and five genes were differentially  
392 expressed (one up-regulated and four down-regulated) in vegetative *Bacillus* (VB) samples  
393 (Figure S7C). Lack of shared differentially expressed genes across cleaning scenarios with either  
394 chemical substances nor *Bacillus* indicated nonspecific response of *K. pneumoniae* biofilm  
395 formation towards different stressors. As biofilm formation is a complex process with an  
396 important role in pathogenesis, more detailed studies in light of biofilm formation prevention for  
397 various pathogenic species through different cleaning strategies are needed.

398

399 Meanwhile, several genes encoding efflux pumps were differentially expressed in APC and  
400 APPC samples with *A. baumannii*, including up-regulated *mexJ* and *mexK*, which encode the  
401 membrane fusion protein and the inner membrane resistance-nodulation-division (RND)  
402 transporter of the MexJK multidrug efflux protein<sup>40</sup>, as well as down-regulated transcriptional

403 repressors of RND-type efflux pumps (e.g., *nalD*<sup>41</sup>, and *adeN*<sup>42</sup>). In samples containing *A.*  
404 *baumannii* and vegetative *Bacillus spp.*, we observed an increased expression of *abaF*, a gene  
405 encoding fosfomycin resistance. The effects of probiotic cleaner on *K. pneumoniae* antibiotic  
406 resistance gene expression were much less pronounced, as only the *kpnF* gene ( $\log_2$  fold change  
407 = -1.09) belonging to major facilitator superfamily (MFS) antibiotic efflux pump and *uhpT* gene  
408 with mutation conferring resistance to fosfomycin were slightly down-regulated ( $\log_2$  fold  
409 change = -1.01) in APPC samples (Figure 4E). However, no genetic determinants of fosfomycin  
410 biosynthesis were identified from *Bacillus spp.* reference genomes. Although bacterial  
411 multidrug resistance (MDR) efflux pumps are intensively studied for their profound impacts in  
412 reducing antibiotic and antimicrobial susceptibilities, efflux pumps also alter transcriptomic  
413 response related to central metabolism, pathogenicity, environmental sensing, and stress  
414 response<sup>43</sup>. For example, the disruption of *abaF* in *A. baumannii* not only resulted in an increase  
415 in fosfomycin susceptibility but also a decrease in biofilm formation and virulence<sup>44</sup>. *arnT* and  
416 *pmrF* genes associated with peptide antibiotic resistance were up-regulated in APC samples for  
417 *K. pneumoniae*, which could be induced by the chemical cleaning product.

418

419 Lastly, both APC and APPC showed pronounced downregulation of genes related to sulfur  
420 metabolism, particularly those induced by sulfur starvation, but the expression of these genes  
421 remained constant when no detergent was used for *A. baumannii* (Figure 4C). These genes  
422 include a NADPH-dependent FMN reductase (*ssuE*) that was down-regulated by 35.13 fold in  
423 APPC and 34.62 fold in APC, and upregulated by 1.30 fold in VB (adjusted p-value > 0.05), as  
424 well as a *tauABCD* operon known to facilitate the utilization of taurine as an alternative sulfur  
425 source under sulfate-deprived environment<sup>45</sup>. Similar down-regulation of sulfonate assimilation

426 genes (*ssuA*, *ssuB*, *ssuC*, *ssuD*, etc.) was observed under elevated temperature and humidity  
427 conditions with APPC (Figure 5C). Owing to the presence of anionic surfactants in liquid  
428 detergent products, such as sodium lauryl ether sulfate (SLES)<sup>46</sup>, these sulfate starvation genes  
429 were likely suppressed in APC and APPC samples. This observation is consistent with studies  
430 that illustrated the overexpression of *tauABCD* and *ssuEADCB* genes induced by sulfate  
431 shortage<sup>47</sup>. Additionally, bacterial utilization of SLES facilitated by *Citrobacter braakii*<sup>48</sup> and a  
432 consortium of *Acinetobacter calcoaceticus*, *Klebsiella oxytoca*, and *Serratia odorifera*<sup>46</sup> has  
433 also been reported in previous studies and may contribute to the persistence of microbial  
434 communities associated with hospital sinks<sup>49</sup>. The molybdenum cofactor biosynthesis operon  
435 genes *moaABCDE*<sup>50</sup> were slightly down-regulated in APC and VB samples but not in APPC  
436 samples for *K. pneumoniae* (Figure 4F). Most sulfur metabolism and antimicrobial resistance  
437 related genes were not differentially expressed in APPC samples for *K. pneumoniae* but were  
438 differentially expressed at different levels of significance in APC or VB samples. It is possible  
439 that the dormant *Bacillus* cells in APPC were buffering the stress caused by chemical cleaner  
440 while the vegetative *Bacillus* cells introduced competition pressure on the surfaces, as mentioned  
441 previously. Further studies on the inter-species interaction between dormant or vegetative  
442 *Bacillus* with different pathogens are needed to facilitate the development of probiotic cleaning  
443 strategies.



**A**

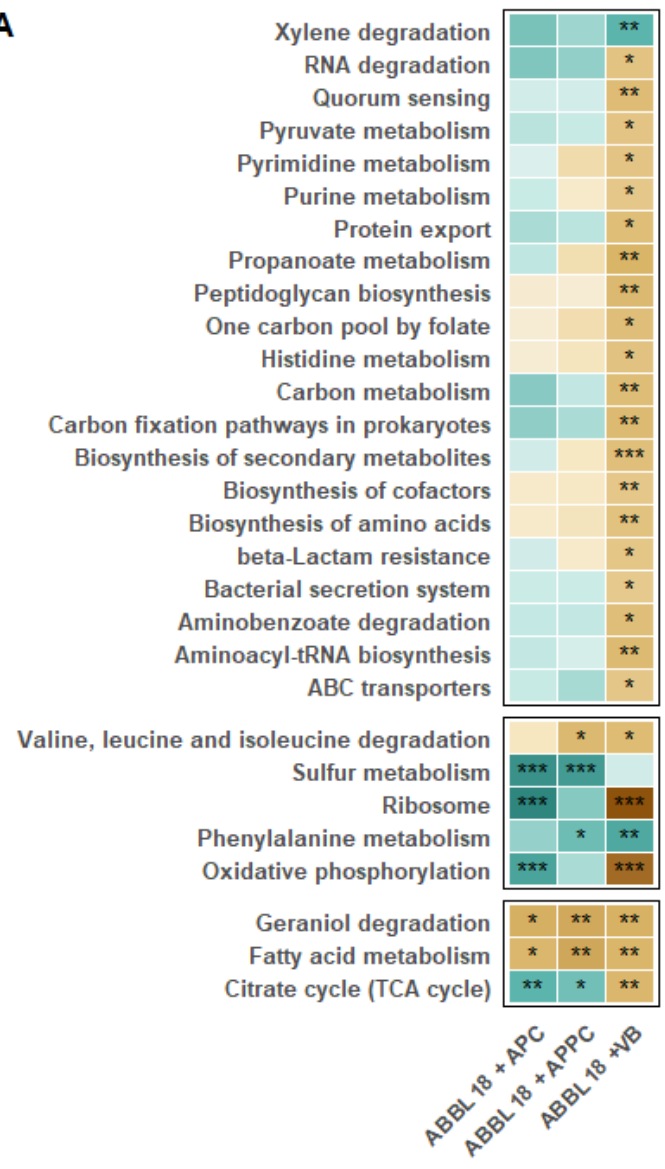

**B**

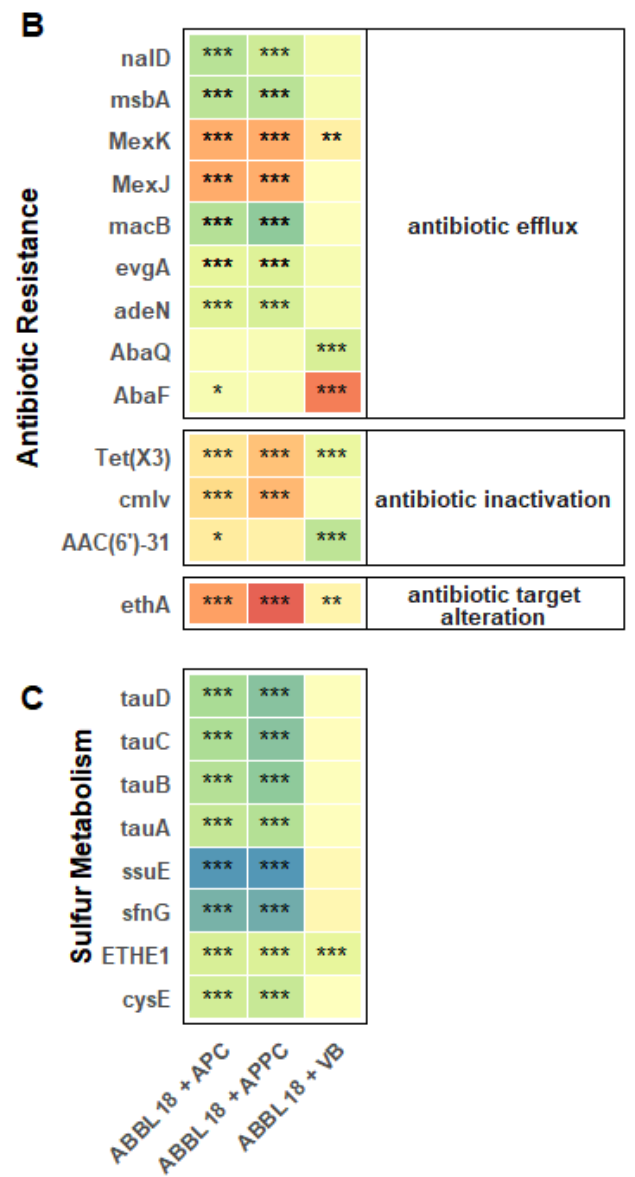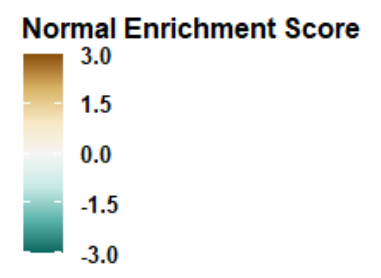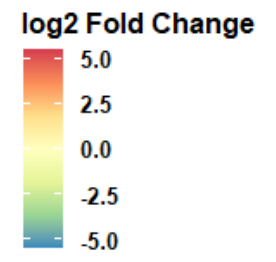

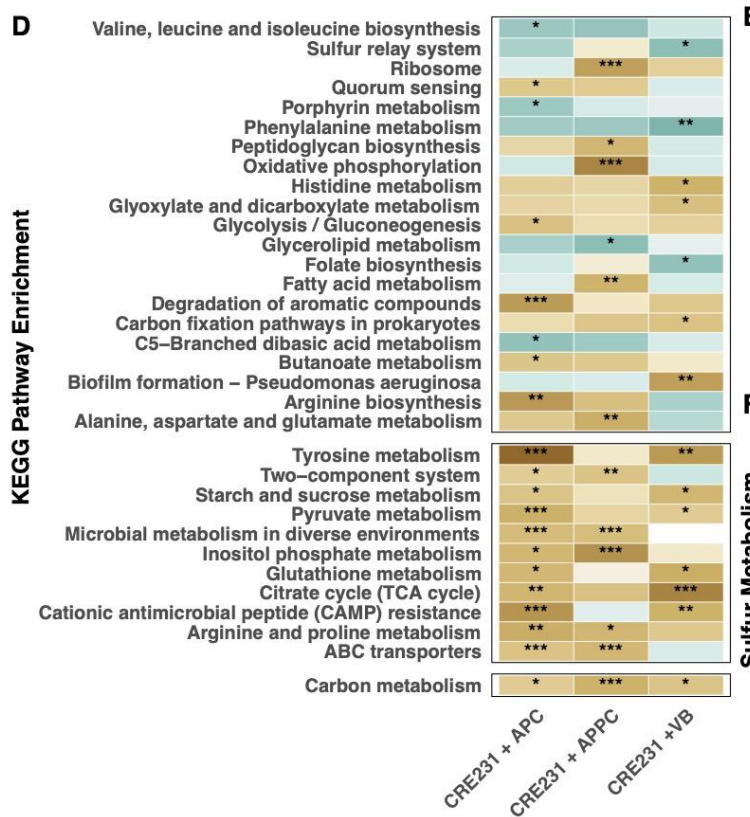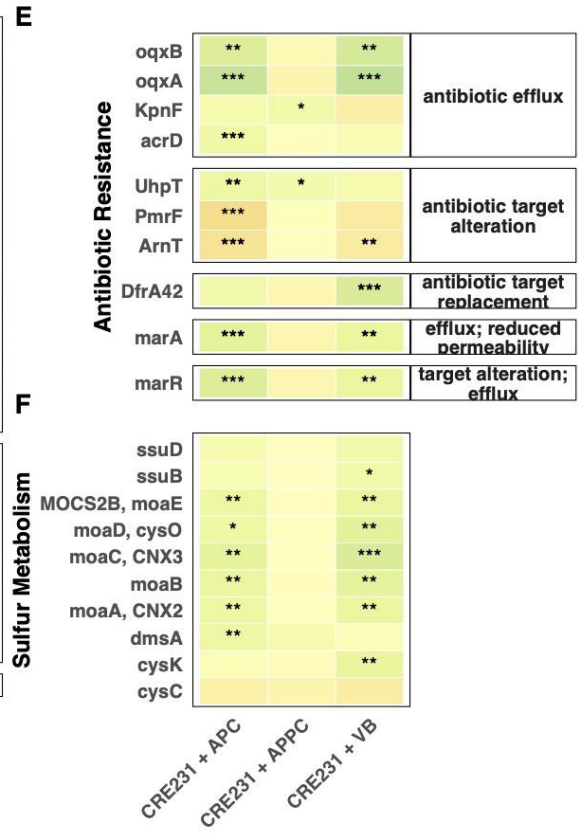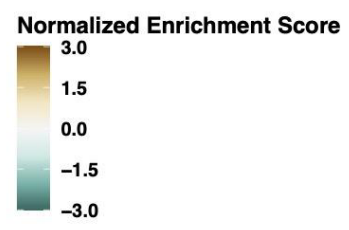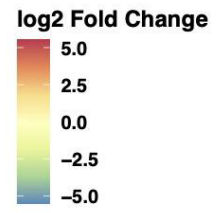

446 Figure 4. KEGG pathway enrichment results for samples collected under ambient  
447 temperature and humidity condition (A, D), log<sub>2</sub> fold change of genes associated with  
448 antibiotic/antimicrobial resistance (B, E), and sulfur metabolism (C, F), compared to no-  
449 cleaning samples (ABBL18 or CRE231). KEGG pathways shown here were statistically  
450 enriched in at least one of the cleaning conditions (Benjamini-Hochberg corrected p-  
451 value ≤ 0.05). Normalized enrichment score (NES) accounts for differences in gene set  
452 size and were used to compare enrichment results across KEGG pathways; a positive  
453 NES suggests an overall positive up-regulation of genes belonging to its corresponding  
454 pathway<sup>32,51,52</sup>. \* p<0.05, \*\* p< 0.01, and \*\*\*p < 0.001.

455

### 456 3.6. Effects of elevated temperature and humidity on pathogen cell motility and biofilm formation

457

458 Although over 1,000 differentially expressed genes were identified from *A. baumannii* or *K.*  
459 *pneumoniae* transcriptomes between the two temperature and humidity conditions, the majority  
460 of the KEGG pathways were composed of genes that were both up-regulated and down-  
461 regulated, rendering non-significant results for most pathways. Several exceptions include xylene  
462 degradation and oxidative phosphorylation, which were down-regulated in *A. baumannii* samples  
463 (Figure 5A, ABBL18 Wet vs ABBL18 Ambient); pentose and glucuronate interconversions,  
464 phenylalanine metabolism, quorum sensing, which were up-regulated; and histidine, inositol  
465 phosphate, and porphyrin metabolism, which were down-regulated in *K. pneumoniae* samples  
466 (Figure 5D, CRE231 Wet vs CRE231 Ambient).

467

468 Under the elevated temperature and humidity condition, the *A. baumannii* transcriptome with  
469 APPC was positively enriched with four pathways related to energy production (oxidative  
470 phosphorylation), biosynthesis of secondary metabolites (e.g., aerobactin) and metabolism (e.g.,  
471 propanoate, glyoxylate, and dicarboxylate). Metabolic pathways, such as toluene, benzoate,  
472 chlorocyclohexane, and chlorobenzene, were suppressed (Figure 5A, APPC Wet vs ABBL18  
473 Wet). Under elevated temperature and humidity, 16 KEGG pathways related to metabolism (10),  
474 membrane transport (3), biosynthesis (2) and translation (1) were enriched in samples with  
475 probiotic cleaner (APPC) compared to no-cleaning *K. pneumoniae* samples. Pathways related to  
476 valine, leucine and isoleucine biosynthesis and sulfur metabolism were suppressed (Figure 5D,  
477 APPC Wet vs CRE231 Wet). This corresponded to the PCA and PERMANOVA results where  
478 environmental conditions (temperature and humidity) affected the transcriptome profiles of *K.*  
479 *pneumoniae* more than *A. baumannii*.

480  
481 In addition to the impact on sulfur metabolism (Figure 5C and Figure 4C) discussed in the  
482 previous section, increased moisture availability likely resulted in an increase in *A. baumannii*  
483 cell motility through Type IV Pili (Figure 5B) without APPC. Increased moisture availability  
484 might also induce a downregulation of osmo-regulation genes such as *envZ* (osmolarity sensor  
485 protein,  $\log_2$  fold change = -1.38) and *betT2* (osmo-dependent choline transporter  $\log_2$  fold  
486 change = -2.14). Type 1 pili help mediate colonization by pathogens and promotes host-pathogen  
487 interaction as an important virulence factor<sup>53,54</sup>. Some type 1 pilus genes (*fimA\_1*, *fim*, and *smf*-  
488 1) were expressed in *K. pneumoniae*, but none were found to be differentially expressed under  
489 different cleaning scenarios or under elevated temperature and humidity (Figure S6D). Although  
490 elevated temperature and humidity did not affect pilus-associated genes, 19 genes related to

491 biofilm formation were differentially expressed in *K. pneumoniae* samples (Figure 5D, CRE231  
492 Wet vs CRE231 Ambient), with 14 down-regulated and 5 up-regulated genes. In addition, the  
493 quorum sensing pathway, which affects biofilm formation of *K. pneumoniae*<sup>55</sup>, was enriched  
494 under elevated temperature and humidity (Figure 5E, CRE231 Wet vs CRE231 Ambient). This  
495 indicated that elevated temperature and humidity could assist the persistence of *K. pneumoniae*  
496 on surfaces (Figure 2B) by altering the biofilm formation related gene expression. The effects of  
497 APPC on *K. pneumoniae* were likely to be masked by the changes due to higher temperature and  
498 humidity (Figure 5E), meaning the benefits of probiotic cleaning products could be more limited  
499 in tropical areas.

500

501 Our results demonstrated the persistence of probiotic *Bacillus* included in the All-Purpose  
502 Probiotic Cleaner up to 72 hours after cleaning, owing to the ability of *Bacillus* spores to survive  
503 unfavorable conditions. *A. baumannii* on surfaces cleaned using chemical-based detergent with  
504 and without probiotic *Bacillus* contained a comparable amount of viable pathogens, possibly due  
505 to the small percentage of germinated *Bacillus* cells and/or slow germination rate on surfaces.  
506 The transcriptome of *A. baumannii* with and without probiotic addition shared a high degree of  
507 similarity in overall gene expression, including reduced material synthesis and surface activities.  
508 On the contrary, the transcriptome of *K. pneumoniae* with probiotic addition showed a high  
509 degree of differences compared to samples with chemical cleaner or vegetative *Bacillus*,  
510 including reduced response in genes related to antimicrobial resistance, sulfur metabolism and  
511 biofilm formation. Longer persistence of viable pathogens on surfaces and reduced effects of  
512 APPC on *K. pneumoniae* overall gene expressions with and without cleaners under elevated  
513 temperature and humidity suggests that vigilant indoor climate control could contribute to

514 infection prevention in healthcare-associated scenarios. As the idea of using probiotic  
515 microorganisms to promote health benefits becomes increasingly attractive in the field of  
516 household cleaning, current understanding on the mechanism and implication of probiotic  
517 cleaning remains limited.

518

### 519 *Acknowledgement*

520

521 This work was supported, in whole or in part, by the Bill & Melinda Gates Foundation INV-  
522 004298. Under the grant conditions of the Foundation, a Creative Commons Attribution 4.0  
523 Generic License has already been assigned to the Author Accepted Manuscript version that  
524 might arise from this submission. JH is supported in part by a Terminal Year Fellowship from  
525 the Northwestern University McCormick School of Engineering. The authors would like to thank  
526 Marina Zelivyanskaya and Dr. Alan R. Hauser for providing clinical isolates of *Acinetobacter*  
527 *baumannii* and *Klebsiella pneumoniae*. We further thank Andreas Wagner for his assistance.

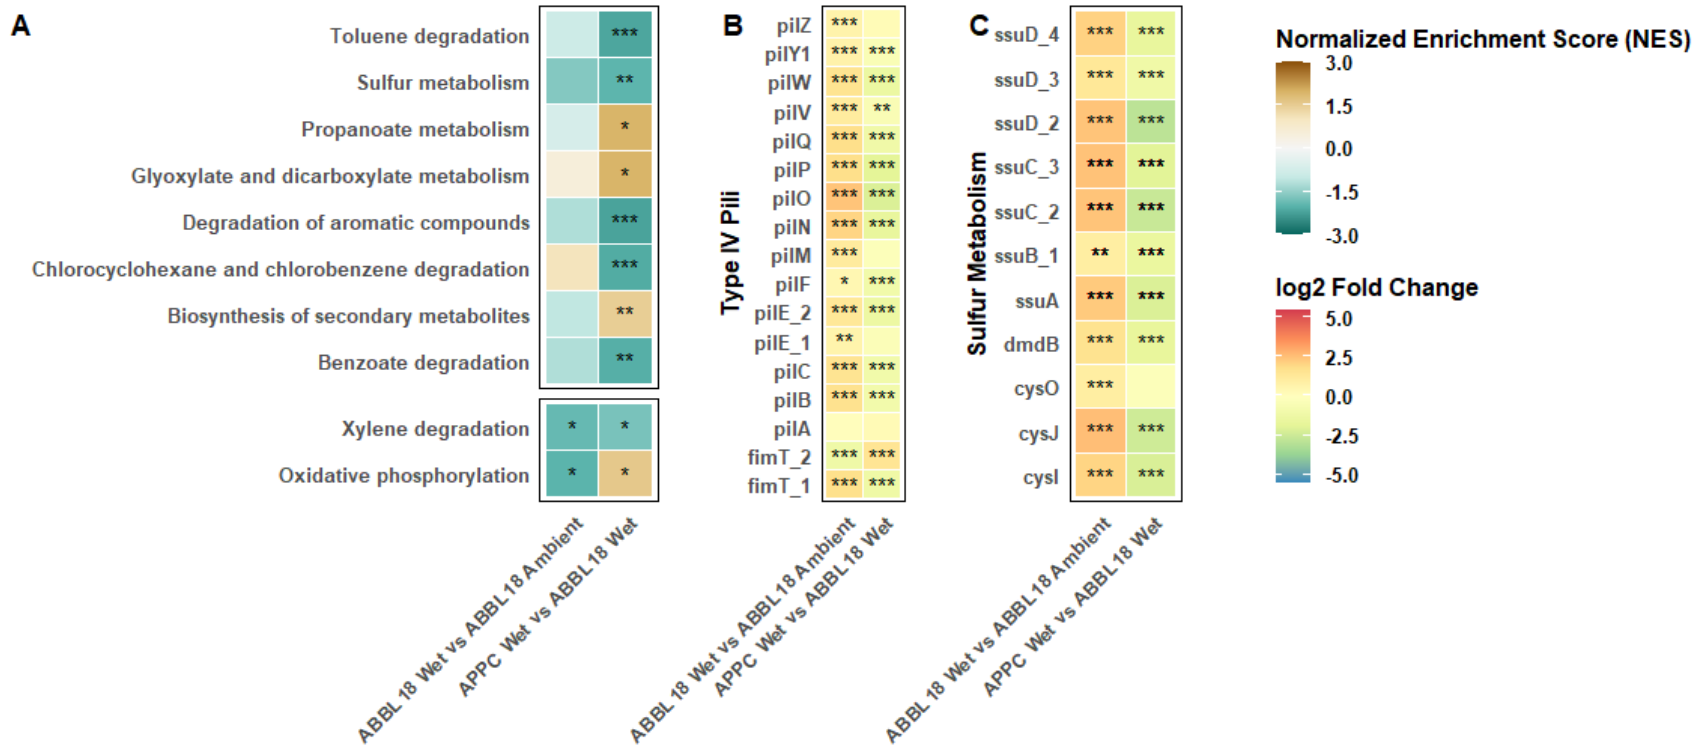

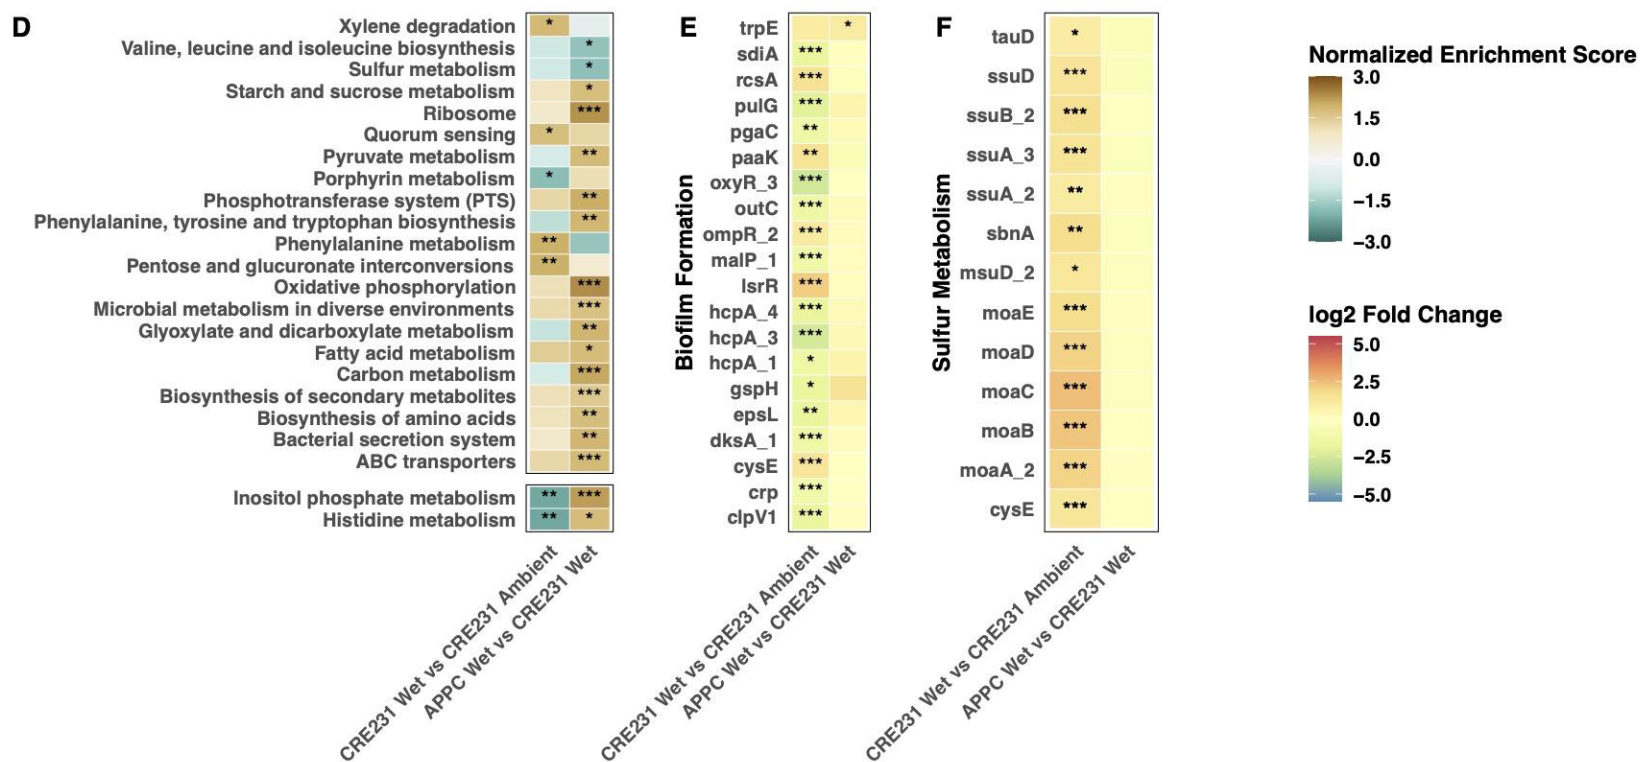

529

530 **Figure 5.** KEGG pathway enrichment results for no-cleaning and APPC samples collected under elevated temperature

531 and humidity condition (A, D), log<sub>2</sub> fold change of genes associated with *Acinetobacter baumannii* cell motility (B),

532 *Klebsiella pneumoniae* biofilm formation (E), and sulfur metabolism (C, F). KEGG pathways shown here were statistically

533 enriched in at least one of the cleaning conditions (Benjamini-Hochberg corrected p-value ≤ 0.05). \* p<0.05, \*\* p< 0.01,

534 \*\*\*p < 0.001.

535



536 References

537

- 538 1. Navon-Venezia, S., Kondratyeva, K. & Carattoli, A. Klebsiella pneumoniae: a major worldwide  
539 source and shuttle for antibiotic resistance. *FEMS Microbiol. Rev.* **013**, 252–275 (2017).
- 540 2. Hussein, K. *et al.* Impact of carbapenem resistance on the outcome of patients' hospital-acquired  
541 bacteraemia caused by Klebsiella pneumoniae. *J. Hosp. Infect.* **83**, 307–313 (2013).
- 542 3. Kramer, A., Schwebke, I. & Kampf, G. How long do nosocomial pathogens persist on inanimate  
543 surfaces? A systematic review. *BMC Infect. Dis.* **6**, 1–8 (2006).
- 544 4. Velazquez, S. *et al.* From one species to another: A review on the interaction between chemistry  
545 and microbiology in relation to cleaning in the built environment. *Indoor Air* **29**, 880–894 (2019).
- 546 5. Barber, O. W. & Hartmann, E. M. Benzalkonium chloride: A systematic review of its  
547 environmental entry through wastewater treatment, potential impact, and mitigation strategies.  
548 *Crit. Rev. Environ. Sci. Technol.* **0**, 1–30 (2021).
- 549 6. Hora, P. I., Pati, S. G., McNamara, P. J. & Arnold, W. A. Increased Use of Quaternary Ammonium  
550 Compounds during the SARS-CoV-2 Pandemic and Beyond: Consideration of Environmental  
551 Implications. *Environ. Sci. Technol. Lett.* **7**, 622–631 (2020).
- 552 7. Hayden, M. K. *et al.* Reduction in acquisition of vancomycin-resistant enterococcus after  
553 enforcement of routine environmental cleaning measures. *Clin. Infect. Dis. an Off. Publ. Infect.*  
554 *Dis. Soc. Am.* **42**, 1552–1560 (2006).
- 555 8. Sitzlar, B. *et al.* An environmental disinfection odyssey: evaluation of sequential interventions to  
556 improve disinfection of Clostridium difficile isolation rooms. *Infect. Control Hosp. Epidemiol.* **34**,

- 557 459–465 (2013).
- 558 9. Quinn, M. M. *et al.* Cleaning and disinfecting environmental surfaces in health care: Toward an  
559 integrated framework for infection and occupational illness prevention. *Am. J. Infect. Control* **43**,  
560 424–434 (2015).
- 561 10. Al-Marzooq, F. *et al.* Can probiotic cleaning solutions replace chemical disinfectants in dental  
562 clinics? *Eur. J. Dent.* **12**, 532–539 (2018).
- 563 11. Caselli, E. *et al.* Impact of a probiotic-based hospital sanitation on antimicrobial resistance and  
564 HAI-associated antimicrobial consumption and costs: a multicenter study. *Infect. Drug Resist.* **12**,  
565 501–510 (2019).
- 566 12. Caselli, E. *et al.* Impact of a Probiotic-Based Cleaning Intervention on the Microbiota Ecosystem  
567 of the Hospital Surfaces: Focus on the Resistome Remodulation. *PLoS One* **11**, 1–19 (2016).
- 568 13. Falagas, M. E. & Makris, G. C. Probiotic bacteria and biosurfactants for nosocomial infection  
569 control: a hypothesis. *J. Hosp. Infect.* **71**, 301–306 (2009).
- 570 14. Suez, J., Zmora, N., Segal, E. & Elinav, E. The pros, cons, and many unknowns of probiotics. *Nat.*  
571 *Med.* **25**, 716–729 (2019).
- 572 15. Andualem, Z., Gizaw, Z., Bogale, L. & Dagne, H. Indoor bacterial load and its correlation to  
573 physical indoor air quality parameters in public primary schools. *Multidiscip. Respir. Med.* **14**, 2  
574 (2019).
- 575 16. Elshagabee, F. M. F., Rokana, N., Gulhane, R. D., Sharma, C. & Panwar, H. Bacillus As Potential  
576 Probiotics: Status, Concerns, and Future Perspectives. *Front. Microbiol.* **8**, 1490 (2017).
- 577 17. Elisashvili, V., Kachlishvili, E. & Chikindas, M. L. Recent Advances in the Physiology of Spore

- 578            Formation for Bacillus Probiotic Production. *Probiotics Antimicrob. Proteins* **11**, 731–747 (2019).
- 579    18.    Vandini, A. *et al.* Hard Surface Biocontrol in Hospitals Using Microbial-Based Cleaning Products.  
580            *PLoS One* **9**, 1–13 (2014).
- 581    19.    Hu, J. *et al.* Impacts of indoor surface finishes on bacterial viability. *Indoor Air* **29**, 551–562  
582            (2019).
- 583    20.    Song, W. *et al.* Modified CHROMagar Acinetobacter medium for direct detection of multidrug-  
584            resistant Acinetobacter strains in nasal and rectal swab samples. *Ann. Lab. Med.* **33**, 193–195  
585            (2013).
- 586    21.    Bankevich, A. *et al.* SPAdes: a new genome assembly algorithm and its applications to single-cell  
587            sequencing. *J. Comput. Biol.* **19**, 455–477 (2012).
- 588    22.    Seemann, T. Prokka: rapid prokaryotic genome annotation. *Bioinformatics* **30**, 2068–2069 (2014).
- 589    23.    Jia, B. *et al.* CARD 2017: expansion and model-centric curation of the comprehensive antibiotic  
590            resistance database. *Nucleic Acids Res.* **45**, D566–D573 (2017).
- 591    24.    Uritskiy, G. V, DiRuggiero, J. & Taylor, J. MetaWRAP—a flexible pipeline for genome-resolved  
592            metagenomic data analysis. *Microbiome* **6**, 158 (2018).
- 593    25.    Parks, D. H., Imelfort, M., Skennerton, C. T., Hugenholtz, P. & Tyson, G. W. CheckM: assessing the  
594            quality of microbial genomes recovered from isolates, single cells, and metagenomes. *Genome*  
595            *Res.* **25**, 1043–1055 (2015).
- 596    26.    Chaumeil, P.-A., Mussig, A. J., Hugenholtz, P. & Parks, D. H. GTDB-Tk: a toolkit to classify genomes  
597            with the Genome Taxonomy Database. *Bioinformatics* **36**, 1925–1927 (2020).
- 598    27.    Kopylova, E., Noé, L. & Touzet, H. SortMeRNA: fast and accurate filtering of ribosomal RNAs in

- 599 metatranscriptomic data. *Bioinformatics* **28**, 3211–3217 (2012).
- 600 28. Kim, D., Langmead, B. & Salzberg, S. L. HISAT: a fast spliced aligner with low memory  
601 requirements. *Nat. Methods* **12**, 357–360 (2015).
- 602 29. Liao, Y., Smyth, G. K. & Shi, W. featureCounts: an efficient general purpose program for assigning  
603 sequence reads to genomic features. *Bioinformatics* **30**, 923–930 (2014).
- 604 30. Love, M. I., Huber, W. & Anders, S. Moderated estimation of fold change and dispersion for RNA-  
605 seq data with DESeq2. *Genome Biol.* **15**, 550 (2014).
- 606 31. Kanehisa, M., Sato, Y. & Morishima, K. BlastKOALA and GhostKOALA: KEGG Tools for Functional  
607 Characterization of Genome and Metagenome Sequences. *J. Mol. Biol.* **428**, 726–731 (2016).
- 608 32. Yu, G., Wang, L.-G., Han, Y. & He, Q.-Y. clusterProfiler: an R package for comparing biological  
609 themes among gene clusters. *OMICS* **16**, 284–287 (2012).
- 610 33. Fenollar, F. & Mediannikov, O. Emerging infectious diseases in Africa in the 21st century. *New  
611 microbes new Infect.* **26**, S10–S18 (2018).
- 612 34. Stubbendieck, R. M. & Straight, P. D. Multifaceted Interfaces of Bacterial Competition. *J.  
613 Bacteriol.* **198**, 2145–2155 (2016).
- 614 35. Butaitė, E., Baumgartner, M., Wyder, S. & Kümmerli, R. Siderophore cheating and cheating  
615 resistance shape competition for iron in soil and freshwater *Pseudomonas* communities. *Nat.  
616 Commun.* **8**, 414 (2017).
- 617 36. Hsieh, P.-F., Lu, Y.-R., Lin, T.-L., Lai, L.-Y. & Wang, J.-T. *Klebsiella pneumoniae* Type VI Secretion  
618 System Contributes to Bacterial Competition, Cell Invasion, Type-1 Fimbriae Expression, and In  
619 Vivo Colonization. *J. Infect. Dis.* **219**, 637–647 (2019).

- 620 37. Struve, C., Bojer, M. & Krogfelt, K. A. Characterization of *Klebsiella pneumoniae* type 1 fimbriae  
621 by detection of phase variation during colonization and infection and impact on virulence. *Infect.*  
622 *Immun.* **76**, 4055–4065 (2008).
- 623 38. Itoh, Y. *et al.* Roles of pgaABCD genes in synthesis, modification, and export of the *Escherichia*  
624 *coli* biofilm adhesin poly-beta-1,6-N-acetyl-D-glucosamine. *J. Bacteriol.* **190**, 3670–3680 (2008).
- 625 39. Wang, X., Preston, J. F. 3rd & Romeo, T. The pgaABCD locus of *Escherichia coli* promotes the  
626 synthesis of a polysaccharide adhesin required for biofilm formation. *J. Bacteriol.* **186**, 2724–  
627 2734 (2004).
- 628 40. Chuanchuen, R., Narasaki, C. T. & Schweizer, H. P. The MexJK efflux pump of *Pseudomonas*  
629 *aeruginosa* requires OprM for antibiotic efflux but not for efflux of triclosan. *J. Bacteriol.* **184**,  
630 5036–5044 (2002).
- 631 41. Morita, Y., Cao, L., Gould, V. C., Avison, M. B. & Poole, K. nalD encodes a second repressor of the  
632 mexAB-oprM multidrug efflux operon of *Pseudomonas aeruginosa*. *J. Bacteriol.* **188**, 8649–8654  
633 (2006).
- 634 42. Rosenfeld, N., Bouchier, C., Courvalin, P. & Périchon, B. Expression of the resistance-nodulation-  
635 cell division pump AdeIJK in *Acinetobacter baumannii* is regulated by AdeN, a TetR-type  
636 regulator. *Antimicrob. Agents Chemother.* **56**, 2504–2510 (2012).
- 637 43. C., B. M. M. *et al.* Beyond Antimicrobial Resistance: Evidence for a Distinct Role of the AcrD Efflux  
638 Pump in *Salmonella* Biology. *MBio* **7**, e01916-16 (2021).
- 639 44. Sharma, A., Sharma, R., Bhattacharyya, T., Bhando, T. & Pathania, R. Fosfomycin resistance in  
640 *Acinetobacter baumannii* is mediated by efflux through a major facilitator superfamily (MFS)  
641 transporter-AbaF. *J. Antimicrob. Chemother.* **72**, 68–74 (2017).

- 642 45. van der Ploeg, J. R. *et al.* Identification of sulfate starvation-regulated genes in *Escherichia coli*: a  
643 gene cluster involved in the utilization of taurine as a sulfur source. *J. Bacteriol.* **178**, 5438–5446  
644 (1996).
- 645 46. Khleifat, K. M. Biodegradation of sodium lauryl ether sulfate (SLES) by two different bacterial  
646 consortia. *Curr. Microbiol.* **53**, 444–448 (2006).
- 647 47. van der Ploeg, J. R., Eichhorn, E. & Leisinger, T. Sulfonate-sulfur metabolism and its regulation in  
648 *Escherichia coli*. *Arch. Microbiol.* **176**, 1–8 (2001).
- 649 48. Dhouib, A., Hamad, N., Hassaïri, I. & Sayadi, S. Degradation of anionic surfactants by *Citrobacter*  
650 *braakii*. *Process Biochem.* **38**, 1245–1250 (2003).
- 651 49. Hu, J. & Hartmann, E. M. Anthropogenic chemicals and their impacts on microbes living in  
652 buildings. *Microb. Biotechnol.* **14**, 798–802 (2021).
- 653 50. Eton & Lepore. 基因的改变 NIH Public Access. *Bone* **23**, 1–7 (2008).
- 654 51. Subramanian, A. *et al.* Gene set enrichment analysis: a knowledge-based approach for  
655 interpreting genome-wide expression profiles. *Proc. Natl. Acad. Sci. U. S. A.* **102**, 15545–15550  
656 (2005).
- 657 52. Mootha, V. K. *et al.* PGC-1 $\alpha$ -responsive genes involved in oxidative phosphorylation are  
658 coordinately downregulated in human diabetes. *Nat. Genet.* **34**, 267–273 (2003).
- 659 53. Rosen, D. A. *et al.* Utilization of an intracellular bacterial community pathway in *Klebsiella*  
660 *pneumoniae* urinary tract infection and the effects of FimK on type 1 pilus expression. *Infect.*  
661 *Immun.* **76**, 3337–3345 (2008).
- 662 54. Spaulding, C. N. *et al.* Functional role of the type 1 pilus rod structure in mediating host-pathogen

663 interactions. *Elife* **7**, (2018).

664 55. De Araujo, C., Balestrino, D., Roth, L., Charbonnel, N. & Forestier, C. Quorum sensing affects

665 biofilm formation through lipopolysaccharide synthesis in *Klebsiella pneumoniae*. *Res. Microbiol.*

666 **161**, 595–603 (2010).

667
